# Supplementary material
Source: PubMed Central journal article supplement (PMC6994380)
Supplement: NIHMS1037147-supplement-Supplemental_Material_1.pdf [file NIHMS1037147-supplement-Supplemental_Material_1.pdf]

Supplementary Table 1: Bivariate correlations at baseline for all study variables by gender.

|                                    | 1      | 2      | 3      | 4      | 5      | 6      | 7      | 8      |
|------------------------------------|--------|--------|--------|--------|--------|--------|--------|--------|
| 1. Relationship Satisfaction       | .47**  | -.42** | .37**  | .61**  | -.26** | -.23** | -.45** | .35**  |
| 2. Negative Communication          | -.41** | .38**  | -.24** | -.41** | .27**  | .22**  | .32**  | -.16** |
| 3. Positive Communication          | .44**  | -.36** | .29**  | .29**  | -.23** | -.08   | -.23** | .18**  |
| 4. Emotional Intimacy              | .58**  | -.43** | .47**  | .13*   | -.28** | -.21** | -.44** | .21**  |
| 5. Self-protective Orientation     | -.24** | .24**  | -.21** | -.28** | .13*   | .16**  | .29**  | -.07   |
| 6. Relationship Problem Acceptance | -.13*  | .18**  | -.01   | -.13*  | .10    | .19**  | .35**  | -.13*  |
| 7. Relationship Problem Severity   | -.42** | .39**  | -.27** | -.39** | .26**  | .22**  | .19**  | -.30** |
| 8. Relationship Problem Confidence | .22**  | -.28** | .17**  | .15*   | -.11   | -.09   | -.27** | .09    |

*Note:* Relationship Problem Acceptance is residualized on problem frequency, consistent with all analyses. Correlations for men are above the diagonal, correlations for women are below the diagonal, and correlations between partners are on the diagonal. \* $p < .05$ ; \*\* $p < .01$
