# Supplementary material
Source: PubMed Central journal article supplement (PMC6994380)
Supplement: NIHMS1037147-supplement-Supplemental_Material_2.pdf [file NIHMS1037147-supplement-Supplemental_Material_2.pdf]

Supplementary Table 2. *Model fit for univariate and bivariate models of change in primary study variables during treatment.*

| Variable                    | Model Type | Chi-square test |    |       | CFI  | RMSEA | SRMR |
|-----------------------------|------------|-----------------|----|-------|------|-------|------|
|                             |            | $\chi^2$        | df | p     |      |       |      |
| Target problem acceptance   | Univariate | 21.359          | 11 | .030  | .964 | .040  | .034 |
|                             | Bivariate  | 63.256          | 41 | .014  | .989 | .030  | .041 |
| Target problem confidence   | Univariate | <.001           | 14 | >.999 | 1.00 | <.001 | .099 |
|                             | Bivariate  | 196.256         | 48 | <.001 | .948 | .072  | .078 |
| Target problem impact       | Univariate | <.001           | 13 | >.999 | 1.00 | <.001 | .074 |
|                             | Bivariate  | 159.298         | 41 | <.001 | .959 | .069  | .061 |
| Emotional intimacy          | Univariate | 19.779          | 3  | <.001 | .963 | .097  | .035 |
|                             | Bivariate  | <.001           | 26 | >.999 | 1.00 | <.001 | .052 |
| Self-protective orientation | Univariate | 25.384          | 4  | <.001 | .938 | .094  | .039 |
|                             | Bivariate  | 95.108          | 27 | <.001 | .971 | .065  | .043 |
| Negative communication      | Univariate | 1.938           | 4  | .747  | 1.00 | <.001 | .065 |
|                             | Bivariate  | 94.244          | 27 | <.001 | .975 | .064  | .059 |
| Positive communication      | Univariate | .829            | 4  | .935  | 1.00 | <.001 | .027 |
|                             | Bivariate  | 95.867          | 27 | <.001 | .971 | .065  | .050 |
| Relationship Satisfaction   | Univariate | 12.196          | 10 | .272  | .999 | .019  | .043 |
