# Supplementary material
Source: PubMed Central journal article supplement (PMC6994380)
Supplement: NIHMS1037147-supplement-Supplemental_Material_3.pdf [file NIHMS1037147-supplement-Supplemental_Material_3.pdf]

Supplementary Table 3. *Model fit for bivariate models of change in primary mechanistic variables and relationship satisfaction in treatment group during follow-up period.*

| Mechanistic Variable        | Chi-square test |           |          | CFI   | RMSEA | SRMR  |
|-----------------------------|-----------------|-----------|----------|-------|-------|-------|
|                             | $\chi^2$        | <i>df</i> | <i>p</i> |       |       |       |
| Target problem acceptance   | 138.966         | 60        | <.001    | 0.942 | 0.066 | 0.045 |
| Target problem confidence   | 114.117         | 51        | <.001    | 0.961 | 0.064 | 0.041 |
| Target problem impact       | 121.015         | 57        | <.001    | 0.961 | 0.061 | 0.042 |
| Emotional intimacy          | 78.345          | 34        | <.001    | 0.971 | 0.066 | 0.040 |
| Self-protective orientation | 84.260          | 36        | <.001    | 0.964 | 0.067 | 0.038 |
| Negative communication      | 77.373          | 35        | <.001    | 0.972 | 0.063 | 0.036 |
| Positive communication      | 82.638          | 36        | <.001    | 0.968 | 0.065 | 0.040 |
